# Supplementary material
Source: publisher figshare collection journal article supplement (https://acs.figshare.com/ndownloader/files/25768513)
Supplement: Supplementary file 1 [file 25768513]

# Supporting information

## Solvothermal Reaction and Piezoelectric Response of Oriented $\text{KNbO}_3$ Polycrystal

Dandan Yang<sup>†</sup>, Yan Wang<sup>†</sup>, Lijie Li<sup>†</sup>, Minggang Yao<sup>†</sup>, Wenxiong Zhang<sup>§</sup>, Hongxi Gu<sup>†</sup>, Sheng Zhang<sup>†</sup>, Mingjin Fan<sup>†</sup>, Galhenage Asha Sewvandi<sup>ϕ</sup>, Dengwei Hu<sup>\*,†</sup>

<sup>†</sup> Faculty of Chemistry and Chemical Engineering, Engineering Research Center of Advanced Ferroelectric Functional Materials, Key Laboratory of Phytochemistry of Shaanxi Province, Baoji University of Arts and Sciences, 1 Hi-Tech Avenue, Baoji, Shaanxi, 721013 P. R. China.

<sup>§</sup> Institute for Solid State Physics, The University of Tokyo, Koto, Sayo, Hyogo 679-5148, Japan

<sup>ϕ</sup> Department of Materials Science and Engineering, Faculty of Engineering, University of Moratuwa, Katubedda, Sri Lanka

\*Corresponding Author

E-mail: [hdwpolymer@yahoo.co.jp](mailto:hdwpolymer@yahoo.co.jp); Fax: +86 (0)917-356-6366; Tel: +86 (0)917-356-6055

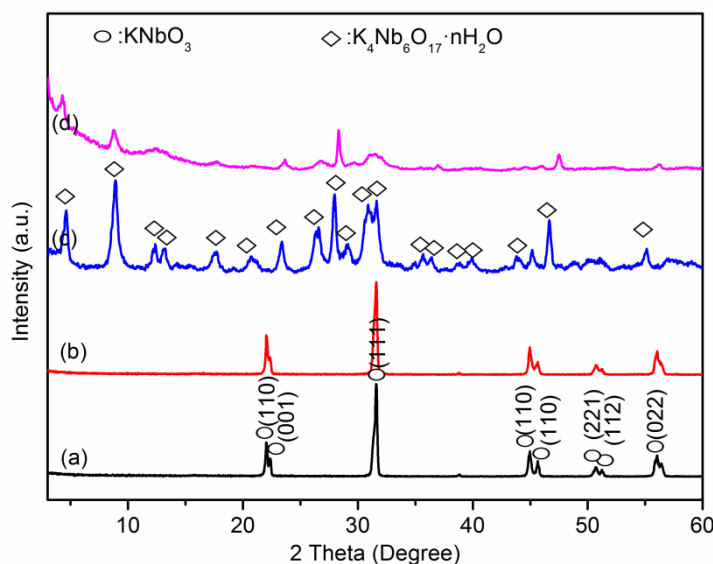

Figure S1. XRD patterns of the specimens obtained using the solvothermal treatments of 3 mL of PHN solution in 27 mL of the water/isopropylamine mixed solvent with volume ratios of (a) 0 : 27, (b) 2 : 25, (c) 12 : 15, (d) 17 : 10 at 230 °C for 12 h,

respectively.

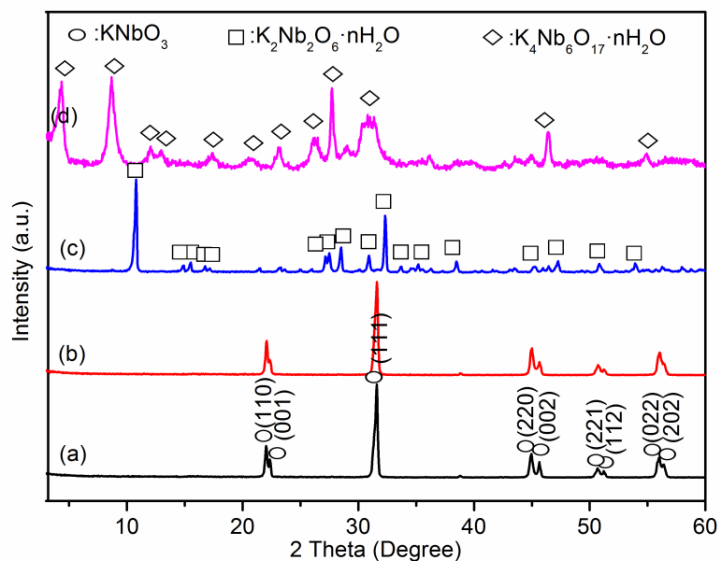

Figure S2. XRD patterns of the specimens obtained using the solvothermal treatments of 3 mL of PHN solution in 27 mL of the water/propylamine mixed solvent with volume ratios of (a) 0 : 27, (b) 2 : 25, (c) 12 : 15, (d) 17 : 10 at 230 °C for 12 h, respectively.

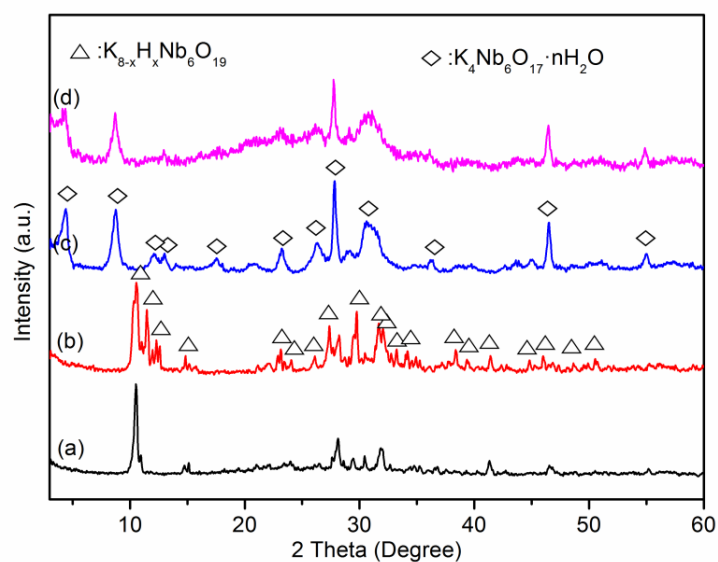

Figure S3. XRD patterns of the specimens obtained using the solvothermal treatments of 3 mL of PHN solution in 27 mL of the water/ethyacetate mixed solvent with volume ratios of (a) 0 : 27, (b) 2 : 25, (c) 12 : 15, (d) 17 : 10 at 230 °C for 12 h, respectively.

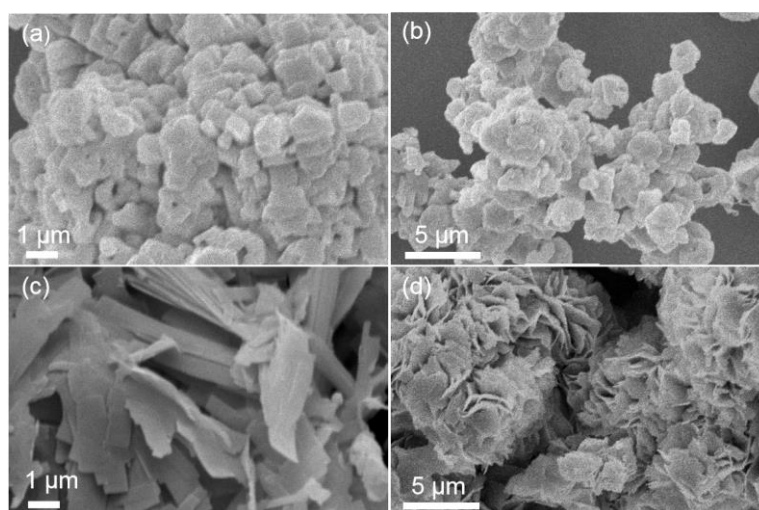

Figure S4. SEM images of the specimens obtained using the solvothermal treatments of 3 mL of PHN solution in 27 mL of the water/isopropylamine mixed solvent with volume ratios of (a) 0 : 27, (b) 2 : 25, (c) 12 : 15, (d) 17 : 10 at 230 °C for 12 h, respectively.

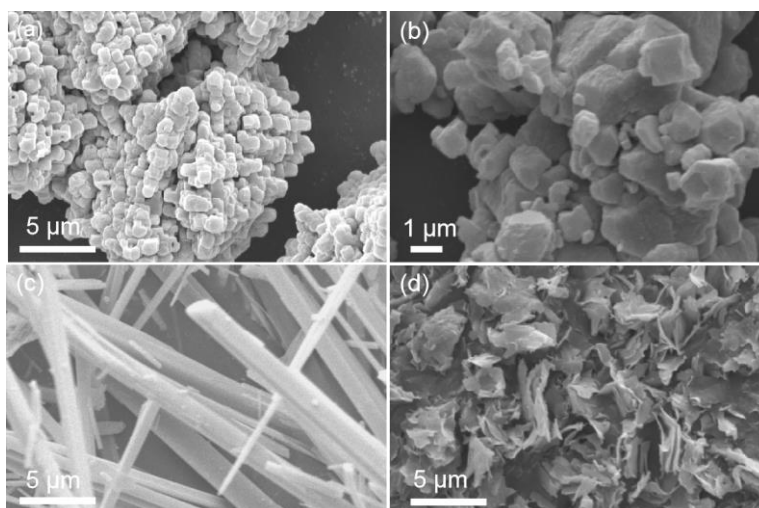

Figure S5. SEM images of the specimens obtained using the solvothermal treatments of 3 mL of PHN solution in 27 mL of the water/propylamine mixed solvent with volume ratios of (a) 0 : 27, (b) 2 : 25, (c) 12 : 15, (d) 17 : 10 at 230 °C for 12 h, respectively.

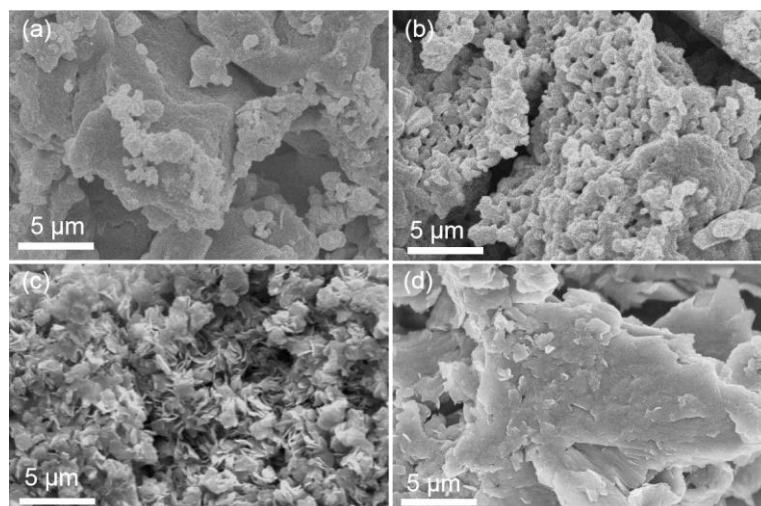

Figure S6. SEM images of the specimens obtained using the solvothermal treatments of 3 mL of PHN solution in 27 mL of the water/ethylacetate mixed solvent with volume ratios of (a) 0 : 27, (b) 2 : 25, (c) 12 : 15, (d) 17 : 10 at 230 °C for 12 h, respectively.

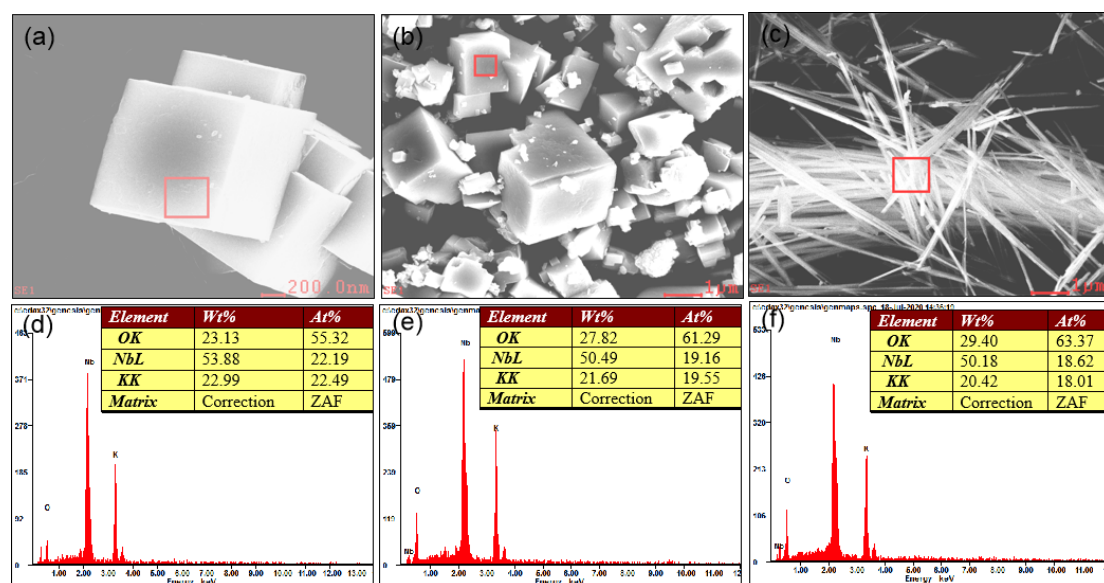

Figure S7. EDS images of the specimens obtained using the solvothermal treatments of 3 mL of PHN solution in 27 mL of the water/ethylnediamine mixed solvent with volume ratios of (a) 0 : 27, (b) 2 : 25 and (c) 12 : 15 at 230 °C for 12 h, respectively, (d), (e) and (f) are the element maps of (a), (b) and (c).

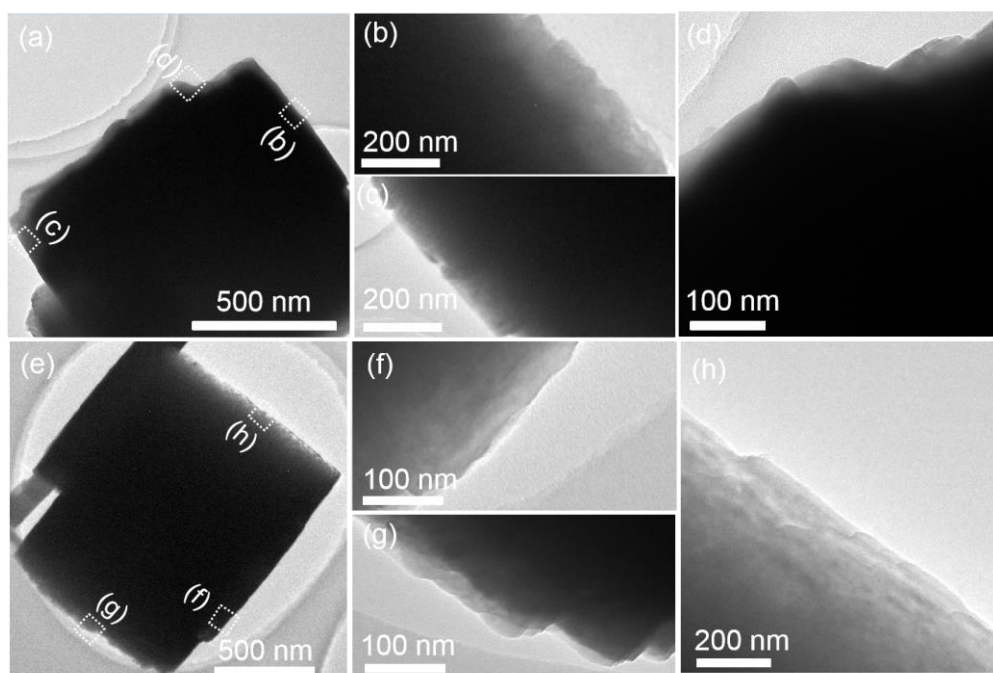

Figure S8. (a) and (e) TEM images of cuboid KN particles. (b-d) and (f-g) TEM images are the enlarged views of (a) and (e) images, respectively. The KN particles obtained using the solvothermal treatments of 3 mL of PHN solution in 27 mL of the water/ethylnediamine mixed solvent with volume ratios of (a) 0 : 27 and (b) 2 : 25 at 230 °C for 12 h, respectively.



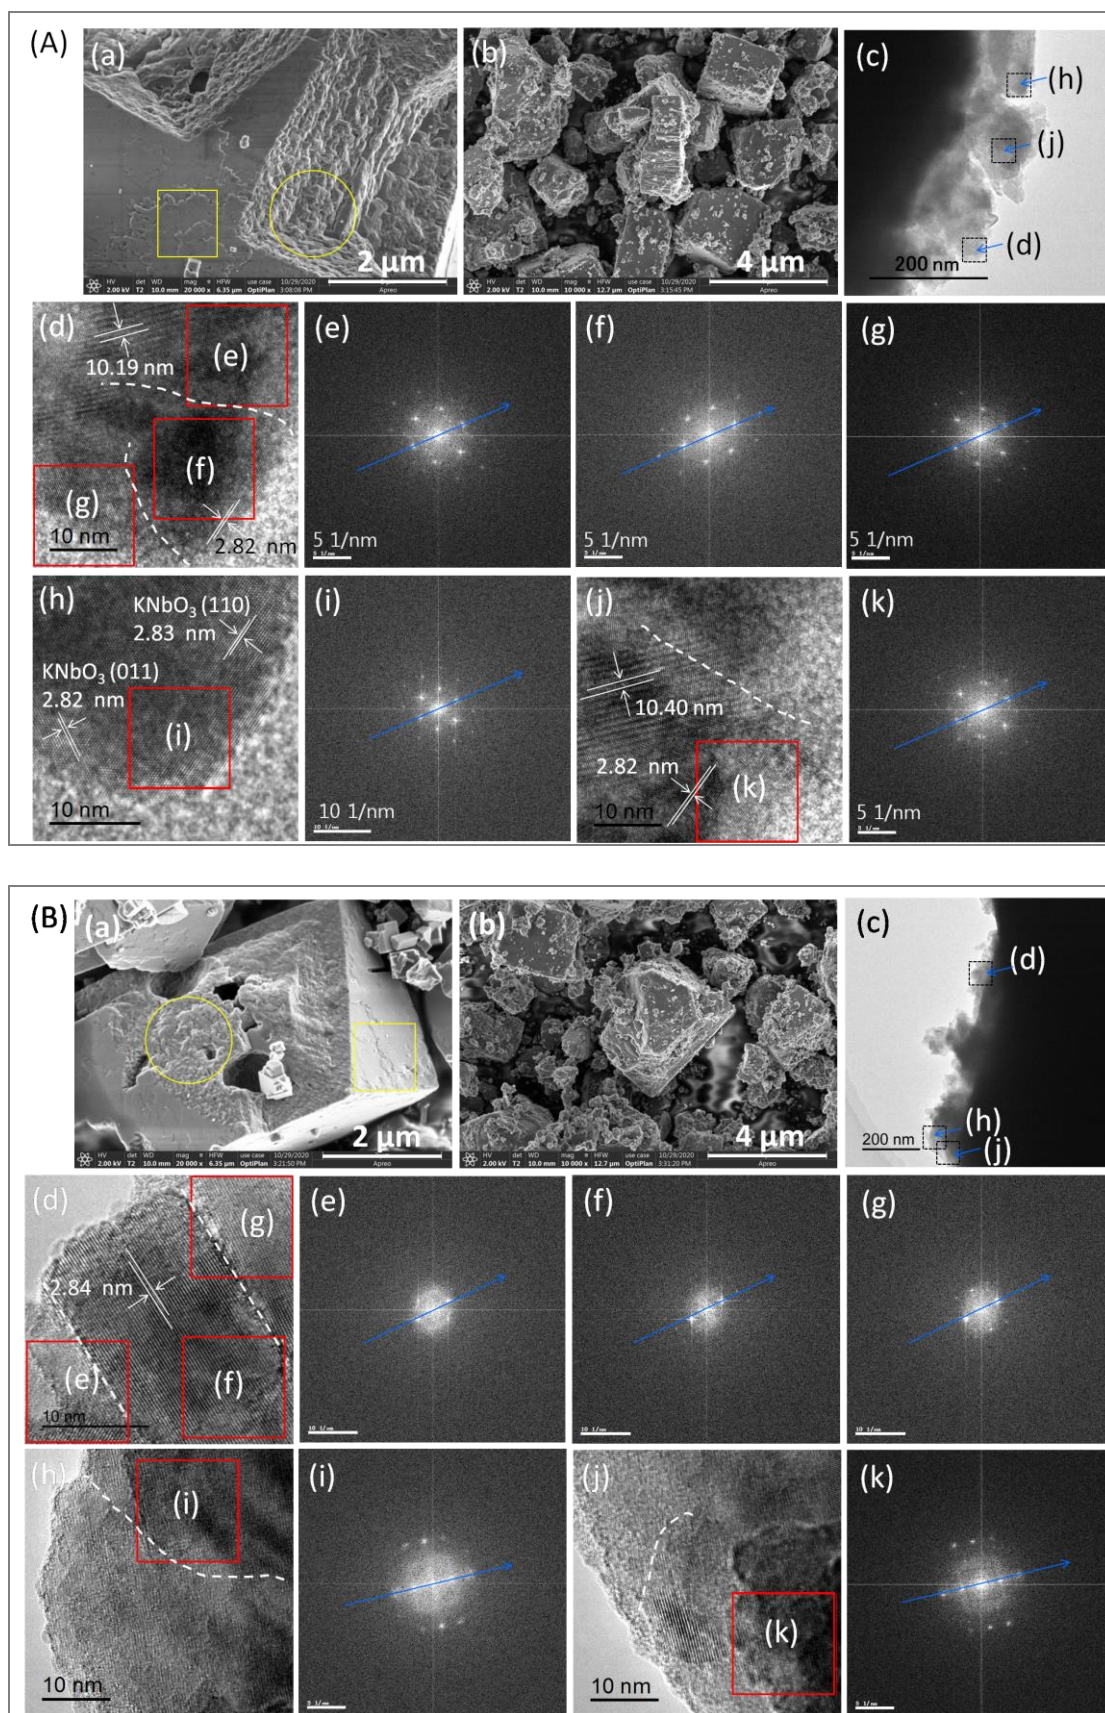

Figure S9. (A-a-b and B-a-b) HRSEM images, (A-c and B-c) TEM images, (A-d,h,j and B-d,h,j) HRTEM images, and (A-e-g,i,k and B-e-g,i,k) Fast Fourier Transform

(FFT) patterns of sliced cuboid KN particles obtained *via* the solvothermal treatments of 3 mL of PHN solution in 27 mL of the water/ethylnediamine mixed solvent with volume ratios of (A) 0 : 27 and (B) 2 : 25 at 230 °C for 12 h, respectively. The (A-d,h,j and B-d,h,j) HRTEM images are derived from the black dotted bordered rectangle in the (A-c and B-c) TEM images, respectively. The (A-e-g,i,k and B-e-g,i,k) FFT patterns are derived from the red square in the (A-d,h,j and B-d,h,j) HRTEM images, respectively.

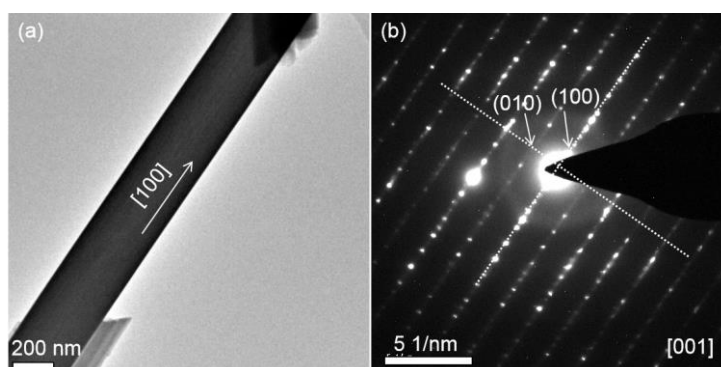

Figure S10. (a) TEM images and (b) SAED patterns of the samples obtained by solvothermal treatments of 3 mL of PHN solution in 27 mL of the water/ethylnediamine (12 : 15) at 230 °C for 12 h, respectively.

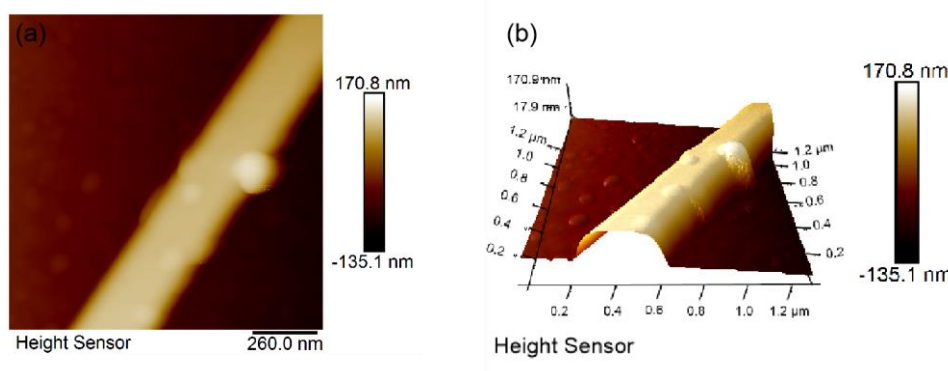

Figure S11. AFM topography images of cuboid  $\text{K}_2\text{Nb}_2\text{O}_6 \cdot n\text{H}_2\text{O}$  polycrystals.

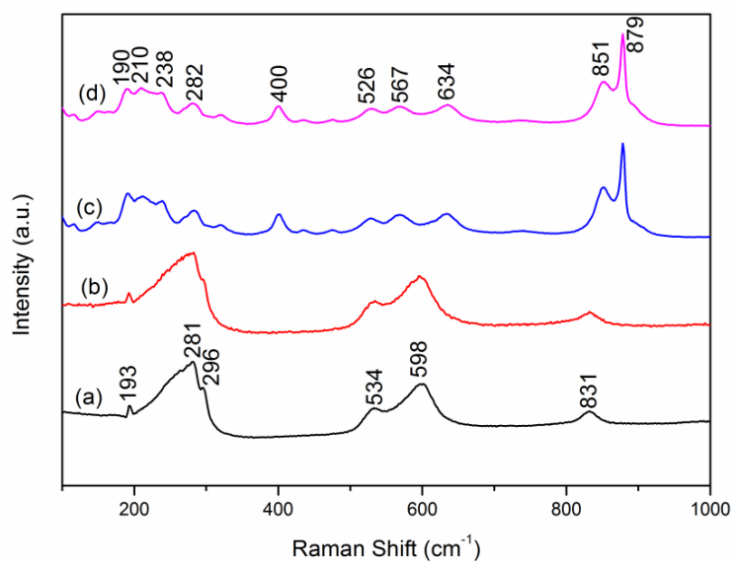

Figure S12. Raman spectra of the specimens obtained using the solvothermal treatment of 3 mL of PHN solution in 27 mL of the water/isopropylamine mixed solvent with volume ratios of (a) 0 : 27, (b) 2 : 25, (c) 12 : 15, (d) 17 : 10 at 230 °C for 12 h, respectively.

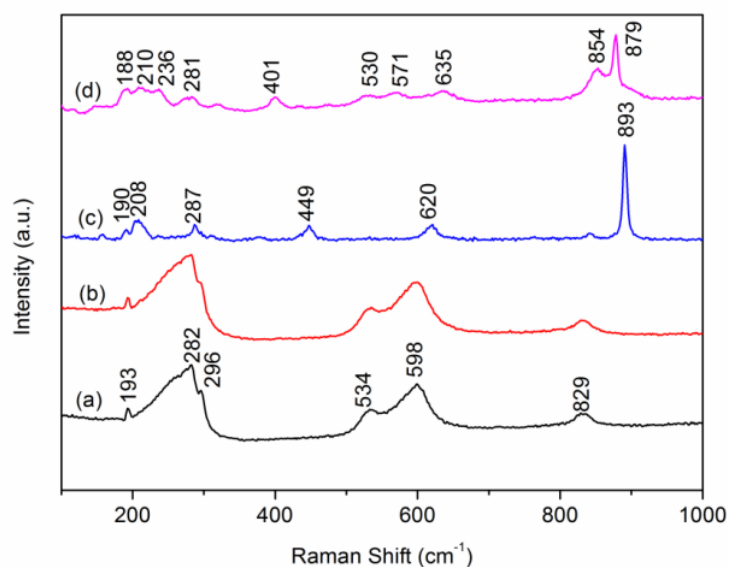

Figure S13. Raman spectra of the specimens obtained using the solvothermal treatment of 3 mL of PHN solution in 27 mL of the water/propylamine mixed solvent with volume ratios of (a) 0 : 27, (b) 2 : 25, (c) 12 : 15, (d) 17 : 10 at 230 °C for 12 h, respectively.



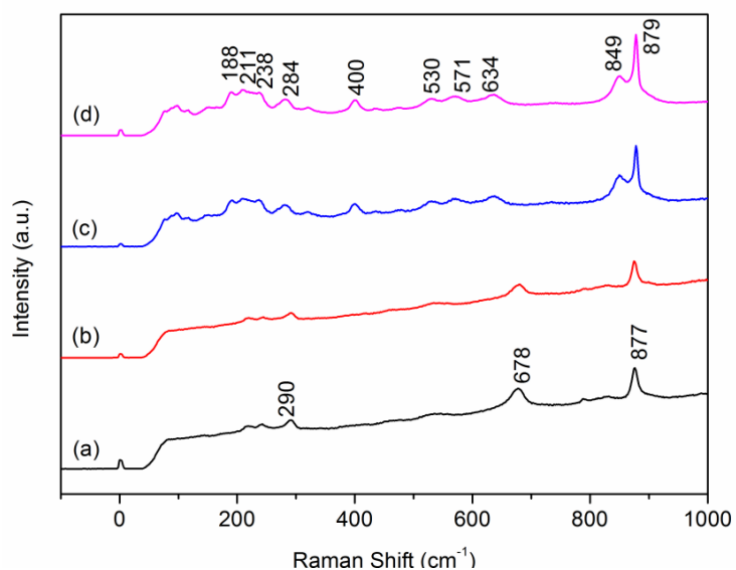

Figure S14. Raman spectra of the specimens obtained using the solvothermal treatments of 3 mL of PHN solution in 27 mL of the water/ethyacetate mixed solvent with volume ratios of (a) 0 : 27, (b) 2 : 25, (c) 12 : 15, (d) 17 : 10 at 230 °C for 12 h, respectively.

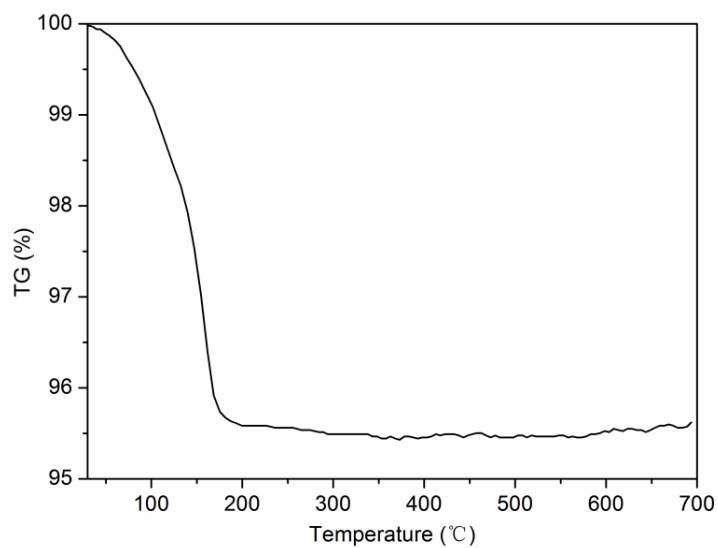

Figure S15. TG profiles of  $\text{K}_2\text{Nb}_2\text{O}_6 \cdot n\text{H}_2\text{O}$  specimen.

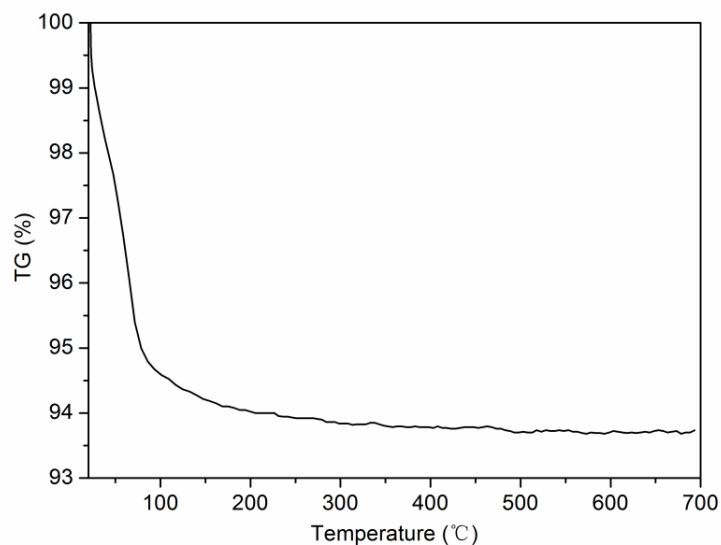

Figure S16. TG profiles of  $K_4Nb_6O_{17} \cdot nH_2O$  specimen.

In this study, values of physical properties for the mentioned solvents are derived from reference [S1], and summarized in Table S1.

Table S1 Values of physical properties for the mentioned solvents<sup>[S1]</sup>

| Molecular<br>formulat  | $pK_1$      | $pK_2$    | Viscosity<br>( $mN \cdot s \cdot m^{-1}$ ) | $D^\square$<br>( $C \cdot m$ ) | Surface tension |                                   |
|------------------------|-------------|-----------|--------------------------------------------|--------------------------------|-----------------|-----------------------------------|
|                        |             |           |                                            |                                | a/ (dyn/cm)     | b/ [dyn/(cm $\cdot$ $^\circ C$ )] |
| <chem>NCCN</chem>      | 6.85 (+2)   | 9.92 (+1) | 1.54                                       | 1.99                           | 44.77           | 0.1398                            |
| <chem>CCCN</chem>      | 10.568 (+1) | —         | 0.353                                      | 1.26                           | 24.86           | 0.1243                            |
| <chem>CC(C)N</chem>    | 10.64 (+1)  | —         | 0.36                                       | —                              | 19.91           | 0.09719                           |
| <chem>CCOC(=O)C</chem> | —           | —         | 0.455                                      | 1.81                           | 26.29           | 0.1161                            |
| <chem>CCO</chem>       | —           | —         | 1.078                                      | 1.69                           | 24.05           | 0.0832                            |

<sup>□</sup>  $D$ : dipole moment

(S1) LANGE' S HANDBOOK OF CHEMISTRY. James G. Speight, Ph.D. *Library of Congress Catalog Card Number* 84-643191, ISSN 0748-4585, 1998.
